# Supplementary material for: Selection of vaccine-candidate peptides from Mycobacterium avium subsp. paratuberculosis by in silico prediction, in vitro T-cell line proliferation, and in vivo immunogenicity
Source: PubMed Central journal article supplement (PMC10861761; doi:10.3389/fimmu.2024.1297955), 2024-01-30
Supplement: Presentation_1.pdf [file Presentation_1.pdf]

## Supplementary material

**Supplementary table 1.** Study design, sampling and analyses for vaccine trials.

|                                                      | Vaccine trials                                                                                                                                                                                                                                                                                                                                                                                           |                                                                                                                                                                                                                                                                                                                                                                                                                                                                                                      |                                                                                                                                                                                                                                                                                                            |
|------------------------------------------------------|----------------------------------------------------------------------------------------------------------------------------------------------------------------------------------------------------------------------------------------------------------------------------------------------------------------------------------------------------------------------------------------------------------|------------------------------------------------------------------------------------------------------------------------------------------------------------------------------------------------------------------------------------------------------------------------------------------------------------------------------------------------------------------------------------------------------------------------------------------------------------------------------------------------------|------------------------------------------------------------------------------------------------------------------------------------------------------------------------------------------------------------------------------------------------------------------------------------------------------------|
|                                                      | Naturally MAP infected goats                                                                                                                                                                                                                                                                                                                                                                             | Healthy goat kids                                                                                                                                                                                                                                                                                                                                                                                                                                                                                    | Healthy heifers                                                                                                                                                                                                                                                                                            |
| <b>Groups and animals</b>                            | 3 adult goats.<br>Infection was confirmed by positive culture, PCR and IFN- $\gamma$ result.                                                                                                                                                                                                                                                                                                             | 24 healthy, castrated, male goat kids.<br>Three groups of 8 animals.                                                                                                                                                                                                                                                                                                                                                                                                                                 | 9 heifers                                                                                                                                                                                                                                                                                                  |
| <b>Peptides for vaccination</b>                      | 59 MHC-predicted peptides and 60 hydrophobic peptides injected in all animals                                                                                                                                                                                                                                                                                                                            | Groups:<br>1) 14 MHC-predicted peptides<br>2) 9 hydrophobic peptides<br>3) Adjuvant only                                                                                                                                                                                                                                                                                                                                                                                                             | 59 MHC-predicted peptides and 60 hydrophobic peptides injected in 8 heifers.<br>1 heifer injected with adjuvant only                                                                                                                                                                                       |
| <b>Vaccinations</b>                                  | Day 0 and week 4                                                                                                                                                                                                                                                                                                                                                                                         | Day 0 and week 5                                                                                                                                                                                                                                                                                                                                                                                                                                                                                     | One injection at day 0                                                                                                                                                                                                                                                                                     |
| <b>Dose and injections sites</b>                     | 50 $\mu$ g /peptide/goat, s.c., neck (2mL)<br>MHC-predicted and hydrophobic peptides administered at separate sides of the neck                                                                                                                                                                                                                                                                          | 20 $\mu$ g/peptide/goat, s.c, axilla (2 mL)                                                                                                                                                                                                                                                                                                                                                                                                                                                          | 20 $\mu$ g/peptide/heifer, s.c, neck (2 mL)<br>MHC-predicted and hydrophobic peptides administered at separate sides of the neck                                                                                                                                                                           |
| <b>Adjuvant</b>                                      | CAF04: 100 $\mu$ l of peptides mixed with 0.5 mL adjuvant and subsequently added 1.4 mL of 10 mM Tris (hydroxymethyl) aminomethane buffer (pH 8.0).                                                                                                                                                                                                                                                      | Montanide ISA61 VG (volume ratio of 4:6 of peptide: adjuvant).                                                                                                                                                                                                                                                                                                                                                                                                                                       | Montanide ISA61 VG (volume ratio of 4:6 of peptide: adjuvant).                                                                                                                                                                                                                                             |
| <b>IFN-<math>\gamma</math> assay</b>                 | <ul style="list-style-type: none"> <li>Day 0 and 2 weeks after 2<sup>nd</sup> immunization.</li> <li>Stimulation with 12 peptide pools (PP) of 9-10 peptides in separate wells.</li> </ul>                                                                                                                                                                                                               | <ul style="list-style-type: none"> <li>Day 0 and 1,2,4,6, and 7 weeks post initial vaccination.</li> <li>Stimulation with all the peptides the goat had been vaccinated with as a single peptide pool. <ul style="list-style-type: none"> <li>Adjuvant group stimulated with both MHC-predicted and hydrophobic peptides.</li> </ul> </li> <li>Stimulation with all peptides the animal had been vaccinated with individually in separate wells (only 4, 6 and 7 weeks post vaccination).</li> </ul> | <ul style="list-style-type: none"> <li>Day 0 and 2, 4, 6 and 8 weeks post vaccination</li> <li>Stimulation with 12 peptide pools (PP) of 9-10 peptides each in separate wells.</li> <li>Stimulation with all 119 peptides individually in separate wells (only 4 and 6 weeks post vaccination).</li> </ul> |
| <b>ELISA for detection of antibodies to peptides</b> | Not done                                                                                                                                                                                                                                                                                                                                                                                                 | <ul style="list-style-type: none"> <li>Day 0, week 4, and week 6 post initial vaccination</li> <li>In house ELISA coated with individual peptides</li> </ul>                                                                                                                                                                                                                                                                                                                                         | <ul style="list-style-type: none"> <li>Day 0, week 2, and week 4 post vaccination</li> <li>In house ELISA coated with individual peptides</li> </ul>                                                                                                                                                       |
| <b>MAP ELISA (IDscreen)</b>                          | Not done                                                                                                                                                                                                                                                                                                                                                                                                 | Not done                                                                                                                                                                                                                                                                                                                                                                                                                                                                                             | 0, 2, 4 and 6 weeks after vaccination                                                                                                                                                                                                                                                                      |
| <b>M. bovis ELISA (IDEXX)</b>                        | Not done                                                                                                                                                                                                                                                                                                                                                                                                 | Not done                                                                                                                                                                                                                                                                                                                                                                                                                                                                                             | 0, 2, 4 and 6 weeks after vaccination                                                                                                                                                                                                                                                                      |
| <b>Tuberculin skin test</b>                          | Not done                                                                                                                                                                                                                                                                                                                                                                                                 | Not done                                                                                                                                                                                                                                                                                                                                                                                                                                                                                             | 8 weeks after vaccination                                                                                                                                                                                                                                                                                  |
| <b>T-cell lines (TCL)</b>                            | <ul style="list-style-type: none"> <li>Mixed and CD4 -selected TCL cultivated with PPDj, and testing against PPDj and <i>E.coli</i>.</li> <li>CD4-selected peptide reactive TCL generated from two weeks after 2<sup>nd</sup> vaccination. <ul style="list-style-type: none"> <li>Cultivation with peptide pools.</li> <li>Testing against peptide pools and individual peptides.</li> </ul> </li> </ul> | <ul style="list-style-type: none"> <li>T-cell lines made from two goats in the MHC-predicted group and four from the selected group.</li> <li>CD4-selected peptide reactive TCL generated from two months after 2<sup>nd</sup> vaccination. <ul style="list-style-type: none"> <li>Cultivation with the peptide pool the goat had been vaccinated with.</li> <li>Testing against peptide pools and individual peptides.</li> </ul> </li> </ul>                                                       | <ul style="list-style-type: none"> <li>CD4-selected peptide reactive TCL generated from three animals 6 weeks after vaccination. <ul style="list-style-type: none"> <li>Cultivation with peptide pools.</li> <li>Testing against peptide pools and individual peptides.</li> </ul> </li> </ul>             |

**Supplementary table 2.** Overview of antibodies used for flow cytometry and generation of T-cell lines.

| Antibody                                     | Clone           | Final concentration (µg/mL) |
|----------------------------------------------|-----------------|-----------------------------|
| CD4 <sup>1</sup>                             | GC1A (goat)     | 10*                         |
| CD4 <sup>1</sup>                             | ILA11A (cattle) | 7.7*                        |
| CD8 <sup>1</sup>                             | CACT80C         | 1                           |
| γδ T-cell receptor <sup>1</sup>              | GB21A           | 5                           |
| IFN-γ <sup>2</sup>                           | CC302           | 5                           |
| APC-conjugated goat anti-mouse <sup>3</sup>  |                 | 5                           |
| FITC-conjugated goat anti-mouse <sup>3</sup> |                 | 10                          |
| PE-conjugated goat anti-mouse <sup>3</sup>   |                 | 5                           |

\*1µg/10x10<sup>6</sup> cells for sorting.

Allophycocyanin (APC), Fluorescein isothiocyanate (FITC), Phycoerythrin (PE).

Producers are listed in regard to superscript; 1. Monoclonal antibody center, USA. 2. Bio-Rad, USA. 3. Southern Biotech, USA.

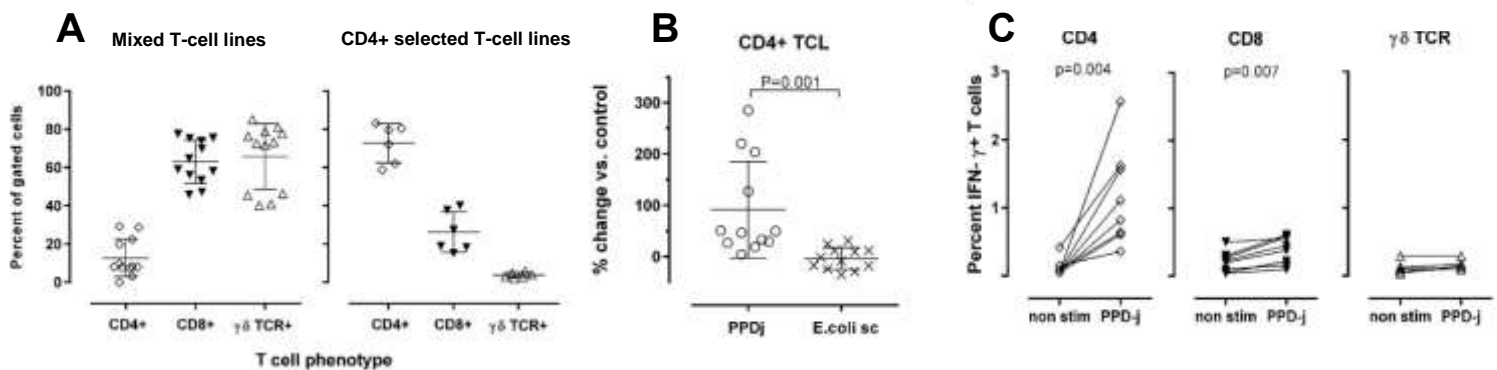

**Supplementary figure 1.**

**Establishment of protocol for generation of T-cell lines using PPDj.** T-cell lines were made from three MAP-infected goats. (A) Flow cytometric phenotyping of T-cell lines for CD4, CD8 or γδ TCR after two weeks of cultivation. The figure shows results in percent positive cells (mean +/- SD) for mixed T-cell lines (left) and CD4+ selected T-cell lines (right). Each symbol represents one T-cell line. (B) Percent change in proliferation (mean +/- SD) of PPDj and *E. coli* sonicate stimulated cells compared with unstimulated controls for CD4+ selected T-cell lines. Each symbol represents one cell line. (C) Intracellular staining for IFN-γ production showing percent IFN-γ positive CD4, CD8 and γδ TCR cells for unstimulated and PPDj stimulated T-cell lines. Two symbols connected with a line represent cells from one T-cell line.

**Supplementary table. 3** Results from the single intradermal comparative cervical tuberculin (SICCT) test of cattle performed eight weeks after vaccination with MAP-specific peptides.

| Animal ID | Skin thickness<br>time of<br>injection<br>(mm) | After 72 hours                                |                                               |                                      |                                      |                                               |
|-----------|------------------------------------------------|-----------------------------------------------|-----------------------------------------------|--------------------------------------|--------------------------------------|-----------------------------------------------|
|           |                                                | Skin<br>thickness<br>PPD <sub>B</sub><br>(mm) | Skin<br>thickness<br>PPD <sub>A</sub><br>(mm) | Increase<br>PPD <sub>B</sub><br>(mm) | Increase<br>PPD <sub>A</sub><br>(mm) | PPD <sub>B</sub><br>minus<br>PPD <sub>A</sub> |
| 26        | 10                                             | 10                                            | 10                                            | 0                                    | 0                                    | 0                                             |
| 29        | 9                                              | 10                                            | 10                                            | 1                                    | 1                                    | 0                                             |
| 32        | 10                                             | 10                                            | 10                                            | 0                                    | 0                                    | 0                                             |
| 49        | 10                                             | 10                                            | 11                                            | 0                                    | 1                                    | -1                                            |
| 50        | 7                                              | 7                                             | 7                                             | 0                                    | 0                                    | 0                                             |
| 52        | 8                                              | 9                                             | 11                                            | 1                                    | 3                                    | -2                                            |
| 54        | 7                                              | 9                                             | 12                                            | 2                                    | 5                                    | -3                                            |
| 64        | 9                                              | 10                                            | 9                                             | 1                                    | 0                                    | 1                                             |

**Supplementary table. 4** Results from the ID Screen paratuberculosis indirect ELISA at day 0 and 2, 4, and 6 weeks after vaccination of cattle with MAP-specific peptides. Results are shown as SP% with interpretation as follows: Positive: SP% >70. Doubtful: 60 < SP% < 70. Negative: SP% < 60.

|                                | Individual animal ID |       |      |      |       |       |       |       |
|--------------------------------|----------------------|-------|------|------|-------|-------|-------|-------|
|                                | 26                   | 29    | 32   | 49   | 50    | 52    | 54    | 64    |
| <b>Day 0</b>                   | 6,2%                 | 6,0%  | 3,5% | 4,7% | 7,8%  | 11,0% | 10,1% | 24,8% |
| <b>Week 2 post vaccination</b> | 7,8%                 | 11,8% | 8,1% | 7,6% | 11,1% | 14,0% | 11,9% | 28,0% |
| <b>Week 4 post vaccination</b> | 7,1%                 | 11,1% | 6,3% | 6,5% | 10,9% | 12,6% | 9,5%  | 27,4% |
| <b>Week 6 post vaccination</b> | 5,8%                 | 12,0% | 8,7% | 6,6% | 10,7% | 10,8% | 10,4% | 27,2% |

**Supplementary table. 5** Results from IDEXX *M. bovis* antibody test at day 0 and 2, 4, and 6 weeks after vaccination of cattle with MAP-specific peptides. Results are shown as S/P ratio. Positive results are S/P ratio >0.3.

|                                | Individual animal ID |        |        |        |        |        |        |        |
|--------------------------------|----------------------|--------|--------|--------|--------|--------|--------|--------|
|                                | 26                   | 29     | 32     | 49     | 50     | 52     | 54     | 64     |
| <b>Day 0</b>                   | -0.076               | -0.057 | -0.084 | -0.057 | -0.061 | -0.064 | -0.058 | -0.076 |
| <b>Week 2 post vaccination</b> | -0.078               | -0.064 | -0.079 | -0.074 | -0.032 | -0.075 | -0.067 | -0.066 |
| <b>Week 4 post vaccination</b> | -0.064               | -0.060 | -0.055 | -0.044 | -0.064 | -0.082 | -0.046 | -0.072 |
| <b>Week 6 post vaccination</b> | -0.059               | -0.037 | -0.069 | -0.062 | -0.051 | -0.074 | -0.061 | -0.043 |
